# Supplementary material
Source: publisher site journal article supplement (https://www.dovepress.com/article/411162)
Supplement: Supplementary file 1 [file get_supplementary_file.php]

**Annex I: Questionnaire and Observational Checklists for Street-Vended Foods.**

Assessment of Bacteriological Quality and Antimicrobial Resistant Patterns of Foodborne Pathogens in Commonly Consumed Street-Vended Foods at Selected Vending Sites of Arba Minch Town, Southern Ethiopia, 2022

**Code no. ______ Items of street-vended food__________ Vending sites___________**

| **QN** | **Questions** | **Coding** | **Skip to** |
| --- | --- | --- | --- |
| 1. **Socio-demographic characteristics of vendors** | | | |
| 001 | Sex of vendor | 1. Male 2. Female |  |
| 002 | Age of vendor | ______________________ |  |
| 003 | Level of education of vendor | 1. No formal education 2. Primary 3. Secondary 4. College and above |  |
| 004 | Vending experiences | 1. < 2years 2. 2-5 years 3. 6-10 years 4. > 11 years |  |
| 005 | Marital status | 1. Married 2. Unmarried |  |
| 1. **Food-Handling and Hygienic Practices of Vendors** | | | |
| 006 | Status of vendors | 1. Ambulant 2. Stationary |  |
| 007 | Place of preparation of food | 1. Home 2. Vending site |  |
| 008 | Hand washing requirements  (multiple answers) | 1. Clean water 2. Soap 3. Clean hand towel 4. Disinfecting solution |  |
| 009 | Reasons for hand washing  (multiple answers) | 1. After touching money 2. After handling garbage 3. After blowing of nose 4. After eating meals 5. After using the toilets 6. After handling raw foods 7. After scratching 8. In continuous food handling |  |
| 010 | Vendor having appropriate clothing for food preparation | 1. Yes 2. No |  |
| 011 | Vendors nails kept short | 1. Yes 2. No |  |
| 012 | Vendor handling food with bare hands | 1. Yes 2. No |  |
| 013 | Preparation of food on site | 1. Yes 2. No |  |
| 014 | Evidence of exposed for dusts a pests, flies and to others | 1. Yes 2. No |  |
| 015 | Presence of hand washing facilities | 1. Yes 2. No |  |
| 016 | Availability of waste disposal facilities | 1. Yes 2. No |  |
| 017 | Availability of closed bins for waste disposal | 1. Yes 2. No |  |
| 018 | Food safety training | 1. Yes 2. No |  |
| 019 | Information about foodborne disease | 1. Yes 2. No |  |
| 020 | Previous history of food borne illness  (multiple answers) | 1. Dysentery from contaminated food 2. Typhoid fever from contamination of food 3. Cholera from contaminated food |  |
| 1. **Hygienic Safety of Commonly Vended Street Foods, collected via an Observational Checklist** | | | |
| 021 | Means of vending | 1. On the floor with basket 2. On shelf in shop 3. On tables with plastic cover 4. On tables without cover |  |
| 022 | Proximity of the vending areas to drainage or sewerage (nearly 1-2 meters) | 1. Yes 2. No |  |
| 023 | Safety of food from dust, sun and winds | 1. Yes 2. No |  |
| 024 | Sheltered vending place | 1. Yes, appropriately 2. Not appropriately |  |
| 025 | Safety of Food Transportation | 1. Appropriate 2. Not appropriate |  |

**Name of Data Collector_________________________ Date _____/_____/_________**

**Questionnaires were developed based on a review of different literatures.**
